# Supplementary material for: Nanoporous microstructures mediate osteogenesis by modulating the osteo-immune response of macrophages
Source: Royal Society of Chemistry journal article supplement (doi:10.1039/c6nr06421c), 2016-11-30
Supplement: c6nr06421c1.pdf [file c6nr06421c1.pdf]

### Supplementary Table 1 RNA Primers applied in this study

| Genes         | Primer sequences                                                                               |
|---------------|------------------------------------------------------------------------------------------------|
| TNF $\alpha$  | <b>Forward:</b> 5'-CTGAACTTCGGGGTGATCGG-3'<br><b>Reverse:</b> 5'-GGCTTGCTCACTCGAATTTTGAGA-3'   |
| IL-18         | <b>Forward:</b> 5'-TGGCCGACTTCACTGTACAAC-3'<br><b>Reverse:</b> 5'-TGGGGTTCCTGGCACTTTG-3'       |
| IL1 $\beta$   | <b>Forward:</b> 5'-TGGAGAGTGTGGATCCCAAG-3'<br><b>Reverse:</b> 5'-GGTGCTGATGTACCAGTTGG-3'       |
| OSM           | <b>Forward:</b> 5'-ACGGTCCACTACAACACCAG-3'<br><b>Reverse:</b> 5'-CCATCGTCCCATTCCCTGAAG-3'      |
| IL6           | <b>Forward:</b> 5'-ATAGTCCTTCTACCCAATTTCC-3'<br><b>Reverse:</b> 5'-GATGAATTGGATGGTCTTGGTCC-3'  |
| CD86          | <b>Forward:</b> 5'-CTGCTCATCATTGTATGTCAC-3'<br><b>Reverse:</b> 5'-ACTGCCTTCACTCTGCATTTG-3'     |
| CD11c         | <b>Forward:</b> 5'-ACTTCACGGCCTCTCTCC-3'<br><b>Reverse:</b> 5'-CACCAGGGTCTTCAAGTCTG-3'         |
| iNOS          | <b>Forward:</b> 5'-CAGAAGTGCAAAGTCTCAGACAT-3'<br><b>Reverse:</b> 5'-GTCATCTTGATTGTTGGGCT-3'    |
| CCR7          | <b>Forward:</b> 5'-ATGACGTCACCTACAGCCTG-3'<br><b>Reverse:</b> 5'-CAGCCCAAGTCCTTGAAGAG-3'       |
| CD206         | <b>Forward:</b> 5'-AGACGAAATCCCTGCTACTG-3'<br><b>Reverse:</b> 5'-CACCCATTGGAAGGCATTC-3'        |
| BMP2          | <b>Forward:</b> 5'-GCTCCACAAACGAGAAAAGC-3'<br><b>Reverse:</b> 5'-AGCAAGGGGAAAAGGACACT-3'       |
| BMP6          | <b>Forward:</b> 5'-TGGCAGGACTGGATCATTGC-3'<br><b>Reverse:</b> 5'-ACCAAGGTCTGTACAATGGCG-3'      |
| WNT10b        | <b>Forward:</b> 5'-CCAGGTGGTAACGGAAAACC-3'<br><b>Reverse:</b> 5'-TGCCCTCCAACAGGTCTTG-3'        |
| TGF $\beta$ 1 | <b>Forward:</b> 5'-CAGTACAGCAAGTCCTTGC-3'<br><b>Reverse:</b> 5'-ACGTAGTAGACGATGGGCAG-3'        |
| VEGF $\alpha$ | <b>Forward:</b> 5'-GTCCCATGAAGTGATCAAGTTC-3'<br><b>Reverse:</b> 5'-TCTGCATGGTGTGTTGCTCTCTG-3'  |
| TRAP          | <b>Forward:</b> 5'-CACTCCCACCCTGAGATTTGT-3'<br><b>Reverse:</b> 5'-CATCGTCTGCACGGTTCTG-3'       |
| RANK          | <b>Forward:</b> 5'-GCAGCTCAACAAGGATACGG-3'<br><b>Reverse:</b> 5'-GGTGCAGTTGGTCCAAGTT-3'        |
| MMP9          | <b>Forward:</b> 5'-GGGCGTGTCTGGAGATTCG-3'<br><b>Reverse:</b> 5'-CACCTGGTTCACCTCATGGTC-3'       |
| SMAD1         | <b>Forward:</b> 5'-GAGATCAATAGAGGAGATGTTCC-3'<br><b>Reverse:</b> 5'-TCGGTCTTATTGTTGGAAG-3'     |
| SMAD4         | <b>Forward:</b> 5'-TACCACCATAACAGCACTAC-3'<br><b>Reverse:</b> 5'-GAACACCAATATTCAGGAGC-3'       |
| SMAD5         | <b>Forward:</b> 5'-GTACTATGAACTGAACAACGG-3'<br><b>Reverse:</b> 5'-TATAGATGGACACCTTTCCC-3'      |
| BMPR2         | <b>Forward:</b> 5'-CATTTGAGGATATGCAGGTTCC-3'<br><b>Reverse:</b> 5'-CTGCCAGGCTATTTTCTTTC-3'     |
| BMPR1a        | <b>Forward:</b> 5'-GACACGTGCGAATTGGACAATG-3'<br><b>Reverse:</b> 5'-CGTCTGATTTTATACCAGTAC-3'    |
| BMPR1b        | <b>Forward:</b> 5'-GAAGCTTATGACAGAGTGCTG-3'<br><b>Reverse:</b> 5'-CTGACGTCAGAGTTTAATGTC-3'     |
| 18S           | <b>Forward:</b> 5'-CGGAACTGAGGCCATGATTAAG-3'<br><b>Reverse:</b> 5'-GTATCTGATCGTCTTCGAACCTCC-3' |

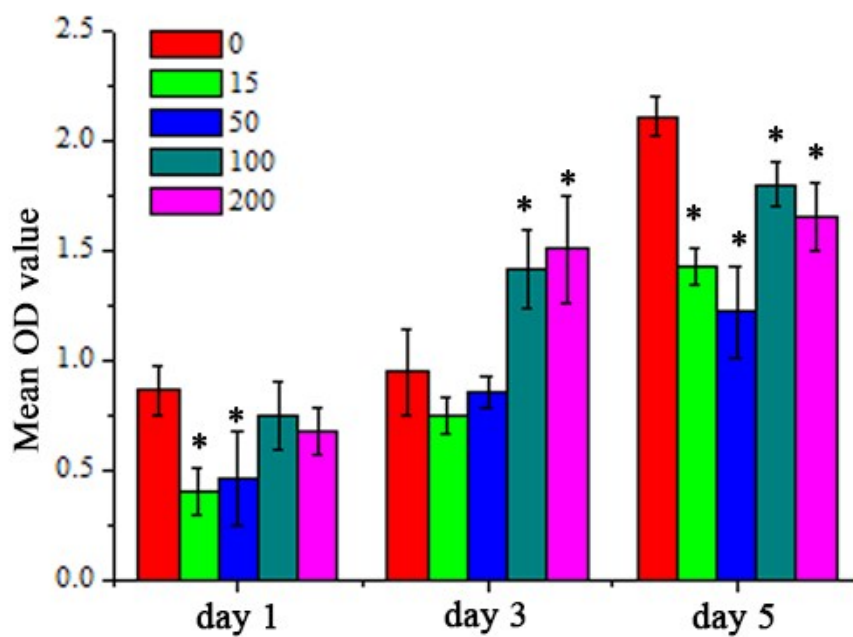

**Supplementary Figure 1.** Proliferation rates of macrophages grown on different alumina surfaces at day 1, 3 and 5 of culture, determined using the MTT assay; \*Significant difference ( $P < 0.05$ ) compared to the 0 group.

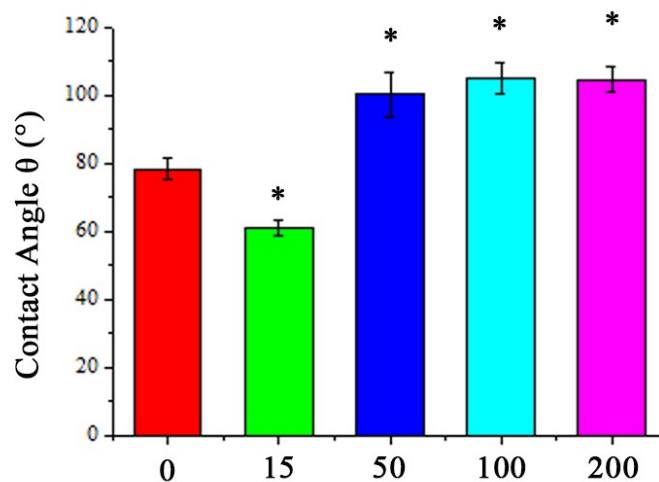

**Supplementary Figure 2.** Contact angle  $\theta$  (°) of different nanoporous structures. The nanoporous structures significantly affected hydrophilicity. 15nm nanoporous surface decreased contact angle while the other surfaces increased the contact angle. \*Significant difference ( $P < 0.05$ ) compared to the 0 group.

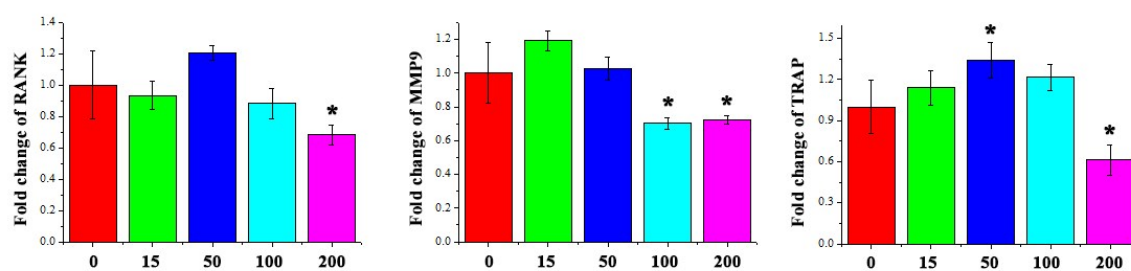

**Supplementary Figure 3.** Osteoclastic activities of macrophages on grown on different nanoporous surfaces. The expression levels of osteoclastic activity marker genes (RANK, MMP9, and TRAP) were determined using RT-qPCR. \*Significant difference ( $P < 0.05$ ) compared to the 0 group.
